# Supplementary material for: Mixed Modeling with Whole Genome Data
Source: Hindawi journal article supplement (doi:10.1155/2012/485174), 2012-01-01
Supplement: f1 [file 485174.f1.pdf]

## Supplementary information

Our focus in this section will be in *R* and compared to *SAS*. Some comments on Bayesian methods will be given at later part of this section.

### *R* implementation

The **kinship** package was used for kinship calculation, linear mixed model as with mixed Cox models. The package was originally implemented in *S-PLUS* and ported to *R* as described in [61]. Some recent initiatives have been made to improve the facilities for handling sparse matrices, various tools for family data including pedigree drawing as with kinship calculation, and mixed effects Cox model, so the original **kinship** package was partitioned into three separate packages called **bdsmatrix**, **kinship2** and **coxme**. The **pedigreemm** package [21] is appropriate for modeling polygenes within the GLMM framework.

### Kinship calculation

A function *makefamid* from **kinship** will generate a “pedigree” type, which can be used by function *makekinship* to obtain kinship matrices from different families,

```
library(kinship)
pid <- with(fam, makefamid(ID, FA, MO))
kmat <- with(fam, makekinship(pid, ID, FA, MO))
```

Note that with GWAS this only needs to be done once and does not have a big overhead. Interestingly, the models for a collection of monozygotic (MZ) and dizygotic (DZ) twins can be treated as a special case. A model using an exchangeable correlation, say, will not be so desirable compared to those using the kinship information<sup>11</sup>. Consider a study of  $n_{MZ}$  MZ and  $n_{DZ}$  DZ twins, we can order that data such that MZ twins precede their DZ counterpart, then function *bdsmatrix* is called to generate the kinship matrix to be used by *glm* for a sporadic model or *lmekin* for a linear mixed model.

---

<sup>11</sup>For twin data, to account for the relationship between twin pairs one can pragmatically specify the correlation structure. In one study of physical activity, we order twin pairs by zygosity such that MZ precede DZ twins in the data, we can then subject the data for analysis with following code.

```

idn <- 1:(2*(nMZ+nDZ))
kmat <- bdsmatrix(rep(2,nMZ+nDZ),c(rep(0.5,3*nMZ),
                                   rep(c(0.5,0.25,0.5),nDZ)),
                 dimnames=list(idn,idn))

glmfit <- glm(paee ~ walkability + age + weight + sex)
summary(glmfit)
kfit <- lme4::glmer(paee ~ walkability + age + weight + sex,
                  random = ~1|id, varlist=list(kmat))
kfit

```

There are a number of other packages available, e.g., **gap** and **identity**.

### Linear mixed model

```

library(kinship)
kkin <- lme4::glmer(Q1 ~ SEX + AGE + SMOKE,
                  data=pg, random = ~1|ID, varlist=list(kmat))
kibd <- lme4::glmer(Q1 ~ SEX + AGE + SMOKE,
                  data=pg, random = ~1|ID,
                  varlist=list(kmat,ibdmat))

```

### Generalized linear mixed model

```

library(pedigreeemm)
bt <- pedigreeemm(AFFECTED ~ SEX + AGE + SMOKE + (1|ID),
                 data=pg, family="binomial"(link="logit"),
                 pedigree=list(ID=ped))

```

### Multivariate model

The package **multic** [46] has facility for multivariate analysis, however, it was bound to particular environments. In principle, this is a computing problem that can be fixed.

### Marginal models

A notable implementation is *R* **gee** package.

```
library(gee)
m1 <- gee(Q1 ~ SEX + AGE + SMOKE, id=pid,
          data=pg, corstr="exchangeable")
summary(m1)
```

To ensure maximum compatibility with the GLMM fit, the scale parameter is chosen to be fixed at the default value of 1. The structure “exchangeable” assumes equal correlations between relatives in a pedigree but in principle this could be modified to use kinship matrix as in *SAS* below.

### Mixed Cox models

This is a Cox model with correlated frailty.

```
library(kinship)
kcox <- coxme(Surv(age, AFFECTED) ~ SEX + SMOKE,
              data=pg, random = ~1|ID, varlist=list(kmat))
```

More information is available from the package vignette.

### kinship2 and coxme

As of 14 March 2012, the current version of **kinship** at CRAN will be archived. This has been due to a recent development which involves splitting the package into three separate ones, namely **bdsmatrix**, **kinship2**, and **coxme**. One only expects a slight change from a user’s perspective, e.g., the way to specify random effects associated with **coxme**. Although this also involves *lmekin*, here only examples with respect to Cox model are given. For the Framingham data contained in **nf**, the diabetes status and age onset were available and the modeling syntax is as follows,

```
library(kinship2)
attach(nf)
f <- makefamid(shareid, fshare, mshare)
k <- makekinship(f, shareid, fshare, mshare)
detach(nf)
library(coxme)
print("Cox model with random intercept")
f1 <- coxme(Surv(agediab, diabetes) ~ sex + (1|pedno), nf)
```

```
f1
print("Cox model with random intercept and additive variance")
k2 <- 2*as.matrix(k)
f2 <- coxme(Surv(agediab, diabetes) ~ sex + (1|shareid), nf,
            varlist=coxmeMlist(k2, rescale=FALSE))
f2
```

The standard Cox model provides a baseline to compare. Note that **kinship2** depends on **Matrix** so `k2` is created for *coxme*.

Suppose we intend to read output **k.dat** from **PLINK**, we can use the following code,

```
k <- read.table("k.dat",header=TRUE)
library(bdsmatrix)
attach(k)
ID <- unique(c(IID1,IID2))
t1 <- cbind(IID1,IID2,PI_HAT)
t2 <- cbind(IID1=ID,IID2=ID,PI_HAT=0.5)
trio <- rbind(t1,t2)
k2 <- bdsmatrix.ibd(trio)
detach(k)
save(k,k2,file="k.RData")
```

Note that we add the diagonal elements in the kinship matrix, which can be loaded with *load*("k.RData").

## regress and MASS

After submission of the paper, we learned about the work in a similar but alternative context [62]. It turned out that the associated package **regress** yielded comparable results to *lmekin* from **kinship** (data not shown).

We have also become aware of the possibility to use *glmmPQL* available from **MASS** [63] and it appears straightforward to use the *corSymm* function in **nlme** to construct a correlation for data on twins and affected sib pairs as input for the *correlation* option, but for data containing general pedigrees this is more involved and we had limited experience of success.

## SAS implementation

*SAS* has used  $G$  and  $R$  to indicate the variance-covariance matrices associated with random and fixed effects. The procedures of interest in *SAS* are MIXED, GLIMMIX, NLMIXED. GLIMMIX is an extension to both PROC GENMOD and PROC MIXED.

When individuals in a pedigree is ordered appropriately, the specification should be as follows,

```
proc inbreed data=families covar outcov=kmat;
    var id fa mo;
run;
```

The following block is for the polygenic model.

```
title kinship only;
proc mixed data=pheno covtest asycov noclprint;
    class id;
    model q1=sex age smoke SNP / noint solution covb;
    random id / type=lin(1) ldata=kmat solution;
run;
proc glimmix data=pheno asycov method=mmpl;
    class id;
    model affected(event='1')=sex age smoke SNP
        / dist=binary link=logit solution covb;
    random id / type=lin(1) ldata=kmat solution;
    random _residual_;
run;
```

By default, PROC MIXED employs REML method. For PROC GLIMMIX, maximum or restricted maximum likelihood approach was applied to a pseudo-likelihood (PL) in the sense that a linearization is applied, leading to abbreviations such as M\_PL and R\_PL, where  $_$  can be subject-specific (S) expansion where linearization is carried out about the current estimate or  $\beta$  and  $U$ , or a marginal (M) expansion where the linearization is about a current estimate of  $\beta$  and  $E(U) = 0$ . If method=QUAD is specified, an adaptive Gauss-Hermite quadrature is used.

The following block is for both oligogenic and polygenic effects

```

title kinship and ibd;
proc mixed data=pheno covtest asycov noprofile;
    class id;
    model q1=sex age smoke / noint solution covb;
    random id / type=lin(2) ldata=kibd solution;
run;
proc glimmix data=pheno asycov method=mmpl;
    class id;
    model affected(event='1')=sex age smoke
        / dist=binary link=logit solution covb;
    random id / type=lin(2) ldata=kibd solution;
    random _residual_;
run;

```

Therefore the method of estimation here is maximum marginal pseudo-likelihood. As can be seen, the second part has extended those available from *R* and the statement “random \_residual\_” also allows for overdispersion.

For Cox model, one can take advantage of the PHREG procedure with RANDOM statement to specify a shared frailty model which can be compared with a model using ID statement to identify clusters.

Finally, one can specify the relationship as *R* part of the variance-covariance matrix as follows,

```

proc mixed data=pheno sandwich;
    class id;
    model q1=sex age smoke / noint;
    repeated / type=lin(1) ldata=kmat sub=pid;
run;

```

Where the PROC statement specifies the data set to be analyzed using a sandwich estimator, MODEL the statistical model, REPEATED the *R* matrix incorporating kinship information.

## Multivariate implementations

### Simulation and estimation for a tri-variate normal data

We simulated 500 samples under a tri-variate normal  $N(\mu, \Sigma)$  with

$$\mu = \begin{pmatrix} 1 \\ 2 \\ 3 \end{pmatrix} \quad \text{and} \quad \Sigma = \begin{pmatrix} 10 & 1 & 2 \\ 1 & 20 & 3 \\ 2 & 3 & 50 \end{pmatrix}$$

The simulation and estimation are furnished as follows,

```
library(regress)
library("MASS")
set.seed(12345)
n <- 500
m <- c(1,2,3)
S <- matrix(c(10,1,2, 1,20,3, 2,3,50),3,3)
Y <- mvrnorm(n,m,S)
y <- as.vector(t(Y))
c <- kronecker(rep(1,n),diag(1,3))
V1 <- matrix(c(1,0,0, 0,0,0, 0,0,0),3,3,byrow=TRUE)
V2 <- matrix(c(0,1,0, 1,0,0, 0,0,0),3,3,byrow=TRUE)
V3 <- matrix(c(0,0,0, 0,1,0, 0,0,0),3,3,byrow=TRUE)
V4 <- matrix(c(0,0,1, 0,0,0, 1,0,0),3,3,byrow=TRUE)
V5 <- matrix(c(0,0,0, 0,0,1, 0,1,0),3,3,byrow=TRUE)
V6 <- matrix(c(0,0,0, 0,0,0, 0,0,1),3,3,byrow=TRUE)
id <- as.vector(t(cbind(1:n,1:n,1:n)))
s1 <- kronecker(diag(1,n),V1)
s2 <- kronecker(diag(1,n),V2)
s3 <- kronecker(diag(1,n),V3)
s4 <- kronecker(diag(1,n),V4)
s5 <- kronecker(diag(1,n),V5)
s6 <- kronecker(diag(1,n),V6)
results <- regress(y~c-1,~s1+s2+s3+s4+s5+s6,pos=c(1,0,1,0,0,1),
                  identity=FALSE,start=c(10,1,20,1,1,30))
apply(Y,2,mean)
cov(Y)
```

which produces results as follows,

Likelihood kernel:  $K = c_1 + c_2 + c_3$

Maximized log likelihood with kernel K is -3041.732

Linear Coefficients:

|    | Estimate | Std. Error |
|----|----------|------------|
| c1 | 0.891    | 0.144      |
| c2 | 2.026    | 0.201      |
| c3 | 3.592    | 0.313      |

Variance Coefficients:

|    | Estimate | Std. Error |
|----|----------|------------|
| s1 | 10.313   | 0.653      |
| s2 | 1.313    | 0.649      |
| s3 | 20.241   | 1.281      |
| s4 | 3.476    | 1.017      |
| s5 | 2.881    | 1.414      |
| s6 | 48.863   | 3.093      |

```
> apply(Y,2,mean)
[1] 0.8908874 2.0262134 3.5922123
> cov(Y)
      [,1]      [,2]      [,3]
[1,] 10.312879  1.313217  3.475876
[2,]  1.313217 20.240644  2.881214
[3,]  3.475876  2.881214 48.863036
```

Through package **regress** we obtained

$$\hat{X} = \begin{pmatrix} 0.89 \\ 2.03 \\ 3.59 \end{pmatrix} \quad \text{and} \quad S = \begin{pmatrix} 10.31 & 1.31 & 3.48 \\ 1.31 & 20.24 & 2.88 \\ 3.48 & 2.88 & 48.86 \end{pmatrix}$$

agreeing with the simulated data. We now turn to the GAW17 data using a multivariate model for Q1, Q2, Q4, with a bit of simplification over covariance specification,

```
library(foreign)
pheno <- read.dta("pheno2.dta")
```

```

kid <- read.csv("kmat.csv")
k <- as.matrix(kid[,-1])

library(regress)
library("MASS")

n <- 697
v1 <- v2 <- v3 <- v4 <- v5 <- v6 <- matrix(0,3,3)
v1[1,1] <- 1
v2[1,2] <- v2[2,1] <- 1
v3[2,2] <- 1
v4[1,3] <- v4[3,1] <- 1
v5[2,3] <- v5[3,2] <- 1
v6[3,3] <- 1
s1 <- kronecker(v1,k)
s2 <- kronecker(v2,k)
s3 <- kronecker(v3,k)
s4 <- kronecker(v4,k)
s5 <- kronecker(v5,k)
s6 <- kronecker(v6,k)
c <- kronecker(rep(1,n),diag(1,3))
id <- as.vector(t(cbind(1:n,1:n,1:n)))
results <- regress(q~-1+c+sex+age+smoke,~s1+s2+s3+s4+s5+s6,
                    identity=FALSE,pos=c(1,0,1,0,0,1),
                    start=c(5.546, 2.999, 3.940, -1.260, -0.780, 0.680),
                    data=pheno)

results

```

The results are given as follows,

Likelihood kernel:  $K = c1+c2+c3+sex+age+smoke$

Maximized log likelihood with kernel K is -1393.867

Linear Coefficients:

|    | Estimate | Std. Error |
|----|----------|------------|
| c1 | 0.565    | 0.108      |
| c2 | 0.531    | 0.109      |
| c3 | 0.526    | 0.109      |

|       |        |       |
|-------|--------|-------|
| sex   | -0.005 | 0.043 |
| age   | -0.013 | 0.001 |
| smoke | -0.019 | 0.051 |

Variance Coefficients:

|    | Estimate | Std. Error |
|----|----------|------------|
| s1 | 4.219    | 0.227      |
| s2 | -0.103   | 0.166      |
| s3 | 4.542    | 0.244      |
| s4 | 0.601    | 0.178      |
| s5 | -0.108   | 0.183      |
| s6 | 5.115    | 0.275      |

## SAS implementation

We first revisit the simulated data generated above. Assuming the  $Y$  and indicator  $c$  are stored in dataset *mv* while the coefficient matrices are stored in *mv\_ldata*, then the appropriate syntax in *SAS* is as follows,

```
proc mixed data=mv covtest asycov noclprint;
  class id c;
  model q=c / noint solution;
  random c*id / type=lin(6) ldata=mv_ldata;
run;
```

Although *SAS* complains about *Convergence criteria met but final hessian is not positive definite*, it turns out that the estimates are fairly close.

### Covariance Parameter Estimates

| Cov Parm | Estimate | Standard Error | Z Value | Pr Z   |
|----------|----------|----------------|---------|--------|
| LIN(1)   | 9.3328   | 0.6529         | 14.30   | <.0001 |
| LIN(2)   | 1.3133   | 0.6494         | 2.02    | 0.0432 |
| LIN(3)   | 19.2612  | 1.2814         | 15.03   | <.0001 |
| LIN(4)   | 3.4760   | 1.0169         | 3.42    | 0.0006 |
| LIN(5)   | 2.8813   | 1.4138         | 2.04    | 0.0415 |

|          |         |        |       |        |
|----------|---------|--------|-------|--------|
| LIN(6)   | 47.8845 | 3.0936 | 15.48 | <.0001 |
| Residual | 0.9797  | 0      | .     | .      |

#### Asymptotic Covariance Matrix of Estimates

| Cov Parm | CovP1    | CovP2   | CovP3    | CovP4   | CovP5   | CovP6   |
|----------|----------|---------|----------|---------|---------|---------|
| LIN(1)   | 0.4262   | 0.05428 | 0.006913 | 0.1437  | 0.01830 | 0.04843 |
| LIN(2)   | 0.05428  | 0.4218  | 0.1065   | 0.06870 | 0.1486  | 0.04015 |
| LIN(3)   | 0.006913 | 0.1065  | 1.6421   | 0.01517 | 0.2338  | 0.03328 |
| LIN(4)   | 0.1437   | 0.06870 | 0.01517  | 1.0341  | 0.1487  | 0.6808  |
| LIN(5)   | 0.01830  | 0.1486  | 0.2338   | 0.1487  | 1.9988  | 0.5643  |
| LIN(6)   | 0.04843  | 0.04015 | 0.03328  | 0.6808  | 0.5643  | 9.5704  |

|                         |        |
|-------------------------|--------|
| -2 Res Log Likelihood   | 8853.4 |
| AIC (smaller is better) | 8867.4 |

#### Solution for Fixed Effects

| Effect | c | Estimate | Standard Error | DF   | t Value | Pr >  t |
|--------|---|----------|----------------|------|---------|---------|
| c      | 1 | 0.8909   | 0.1436         | 1497 | 6.20    | <.0001  |
| c      | 2 | 2.0262   | 0.2012         | 1497 | 10.07   | <.0001  |
| c      | 3 | 3.5922   | 0.3126         | 1497 | 11.49   | <.0001  |

#### Type 3 Tests of Fixed Effects

| Effect | Num DF | Den DF | F Value | Pr > F |
|--------|--------|--------|---------|--------|
| c      | 3      | 1497   | 76.12   | <.0001 |

We now return to the GAW17 data. With the same specification of Q1, Q2, and Q4 in a single outcome, along with a variable  $c$  corresponding to particular traits, the GLMMIX counterpart is as follows,

```

title kinship and multivariate;
proc mixed data=pheno2 covtest asycov noclprint;
    class id c;
    model q=c sex age smoke / noint solution covb;
    random c*id / type=lin(6) ldata=ldata solution;
run;

```

Note that in addition to a comparable estimate to the *R* implementation, the *REPEATED /group=c* statement also adds trait-specific residual variances. Furthermore, *ldata* contains the coefficient matrix generated from kinship matrix *kmat* via the following code,

```

proc iml;
    use kmat;
    read all var _num_ into kmat;
    k=0;
    do i=1 to 3;
        do j=1 to i;
            j3=j(3,3,0);
            j3[i,j]=1;
            j3[j,i]=1;
            v=j3@kmat;
            k=k+1;
            vp=v||j(nrow(v),1,k);
            if k=1 then vps=vp;
            else vps=vps//vp;
        end;
    end;
    create vps from vps;
    append from vps;
    close vps;
quit;
libname x '.';
data x.ldata;
    set vps (rename=(col2092=parm));
    by parm;
    if first.parm then row=1;
    else row+1;
run;

```

By default variance components can have lower boundary constraint of 0, in cases this is not so one can use the PARMs statement, e.g., for the multi-variate example as

```
parms / lowerb=1e-4,.,1e-4,.,.,1e-4,1e-4,1e-4,1e-4;
```

which informs the procedure to use default values (.) as lower boundaries for the the covariances while 0.0001 for the variances.

## BUGS<sup>12</sup>

The BUGS (Bayesian inference Using Gibbs Sampling) project is concerned with flexible software for the Bayesian analysis of complex statistical models using Markov chain Monte Carlo (MCMC) methods. Initiatives have been made to make it available to Windows and other platforms and link with the *R* project.

Analysis of family data has been described but we could not access the source code associated with [26]. According to [25], the models we have described can be straightforwardly implemented in software such as *WinBUGS* but the implementation still requires founders precede their offsprings though it is not necessary to do so with *R* in general and *SAS* for the examples used here. It remains to explore the possibility to combine ideas in those implementations. However, analysis via WINBUGS is expected to be slower.

---

<sup>12</sup>See <http://www.mrc-bsu.cam.ac.uk/bugs/welcome.shtml>
